# Supplementary material
Source: Royal Society of Chemistry journal article supplement (doi:10.1039/d6nr00814c)
Supplement: d6nr00814c1.pdf [file d6nr00814c1.pdf]

# Supporting Information

## Multicolor room-temperature phosphorescence induced by aggregation and TS-FRET of carbon dot composites

Jiayi Zhang<sup>a</sup>, Wensheng Xu<sup>a</sup>, Jiang Liu<sup>a</sup>, Bin Li<sup>a</sup>, Run Wang<sup>a</sup>, Jianchao Ma<sup>c</sup>, Linshuo Jiang<sup>b</sup>, Yin Xiao<sup>b</sup>, Yang Li<sup>a,d</sup>, Xilong Yan<sup>a,d</sup>, Ligong Chen<sup>a,d</sup>, Bowei Wang<sup>a,d\*</sup>

a. School of Chemical Engineering and Technology, Tianjin University Tianjin 300350 (P.R.China)

b. College of Chemistry and Chemical Engineering, Yulin University, Yulin 719000 (P.R.China)

c. College of Mining Engineering, Taiyuan University of Technology Taiyuan 030024 (P.R.China)

d. Tianjin Key Laboratory of Applied Catalysis Science and Technology, 300350, (P. R. China)

E-mail: bwwang@tju.edu.cn (B.W.)

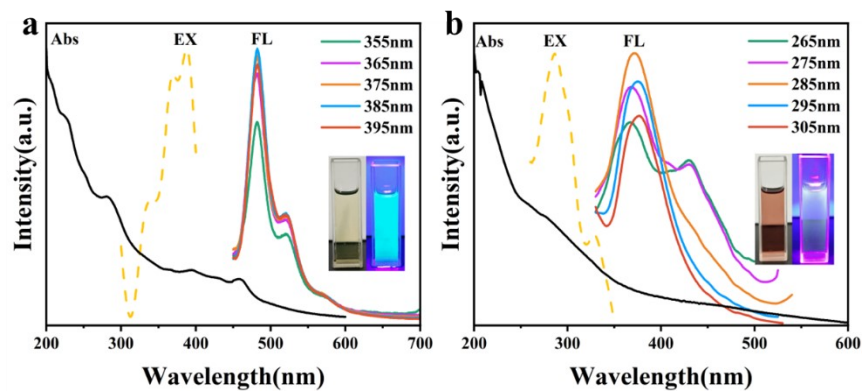

Fig.S1. UV-vis absorption, fluorescence excitation and emission spectra of a) PGCDs and b) CCCDs.

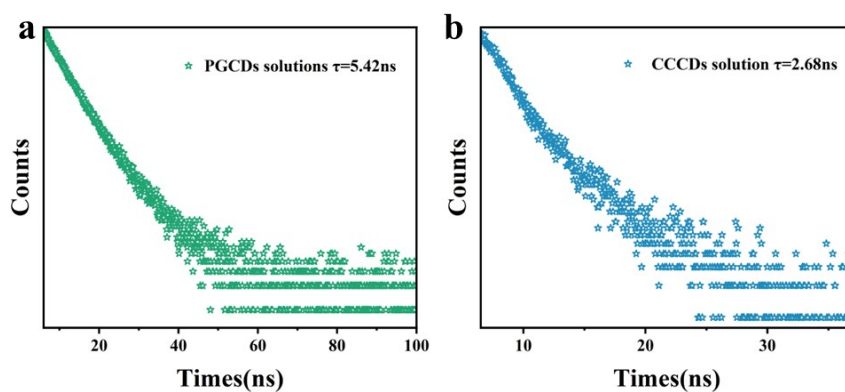

Fig.S2. FL decay curves of a) PGCDs and b) CCCDs in solution.

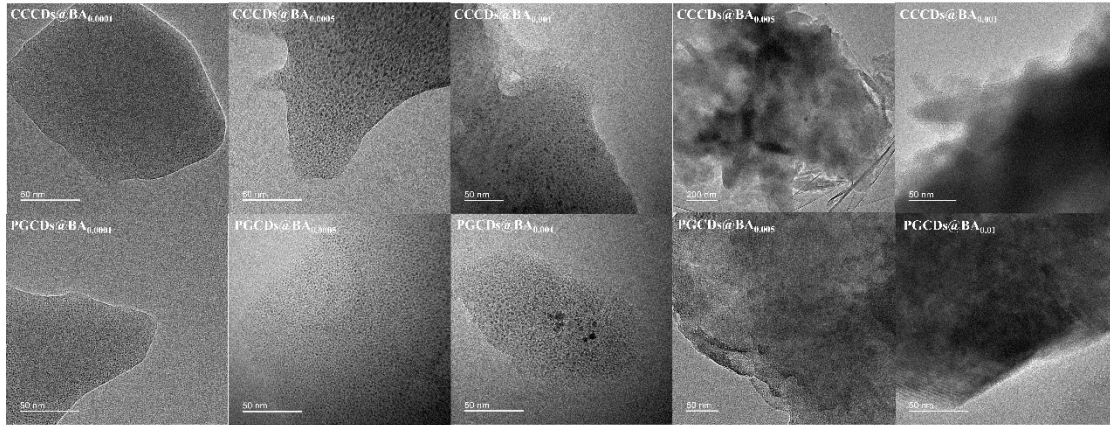

Fig.S3. TEM images of PGCDs@BA and CCCDs@BA powders with different doping concentrations.

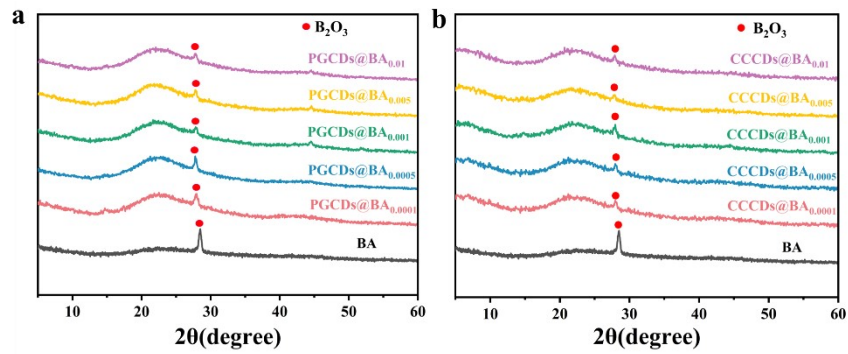

Fig.S4. XRD patterns of a) PGCD@BAx and b) CCCD@BAx.

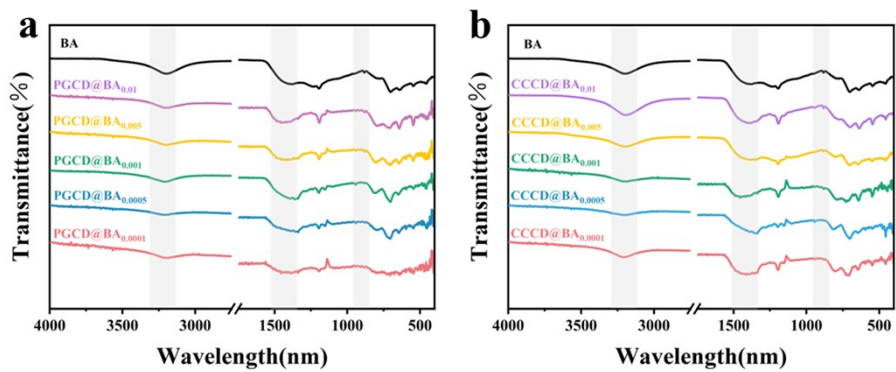

Fig.S5. FTIR spectra of a) PGCD@BAx and b) CCCD@BAx.

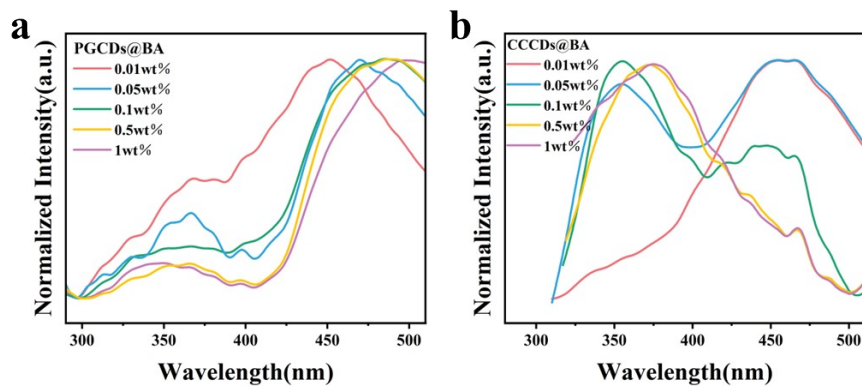

Fig.S6. Fluorescence spectra of a) PGCD@BAx and b) CCCD@BAx.

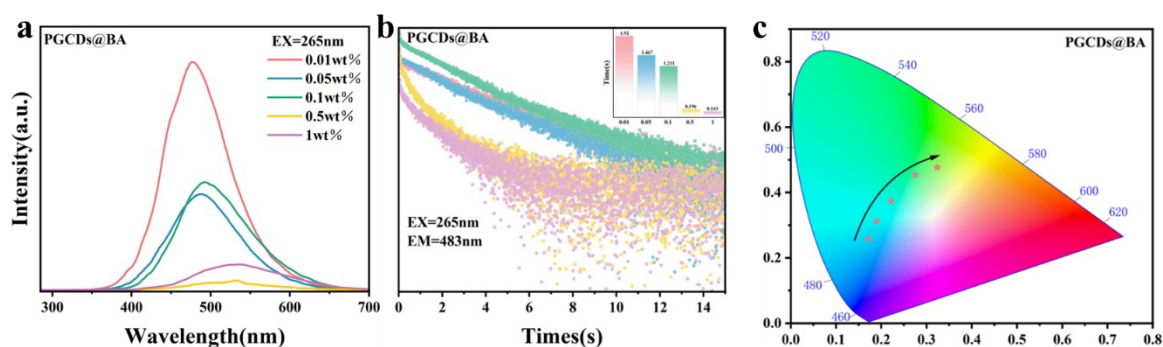

Fig. S7. a) Delayed PL spectra, b) lifetime decay profiles under 265 nm irradiation, and c) CIE coordinates of PGCDs@BA with different doping concentrations.

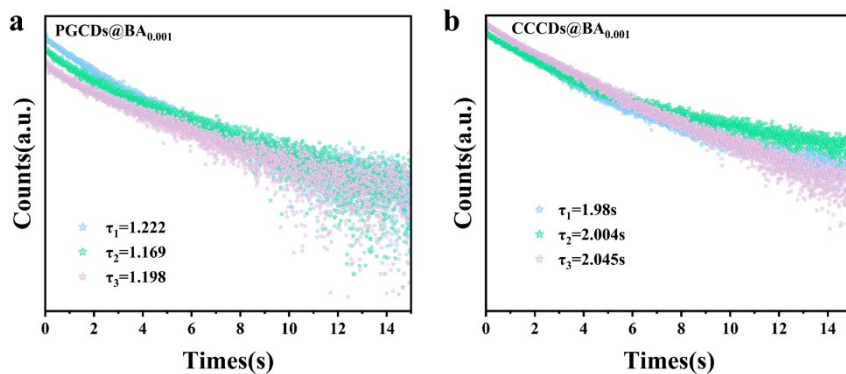

Figure.S8 Lifetime error bars for (a) CCCDs@BA<sub>0.001</sub> and (b)PGCDs@BA<sub>0.001</sub>.

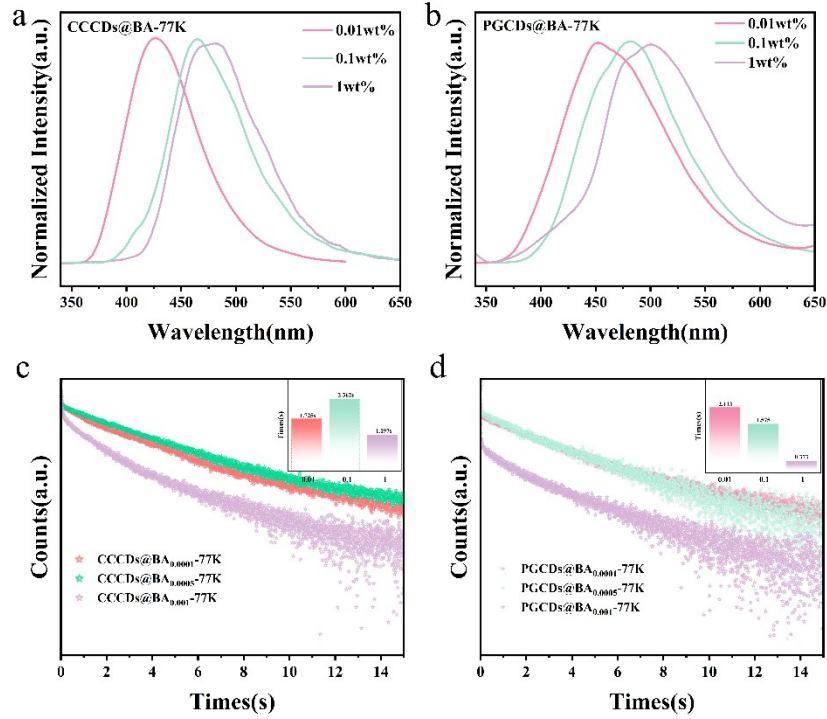

Fig.S9. 77 K phosphorescence spectra of (a) CCCDs and (b) PGCDs, and their corresponding lifetimes at 77 K (c and d), under different doping concentrations.

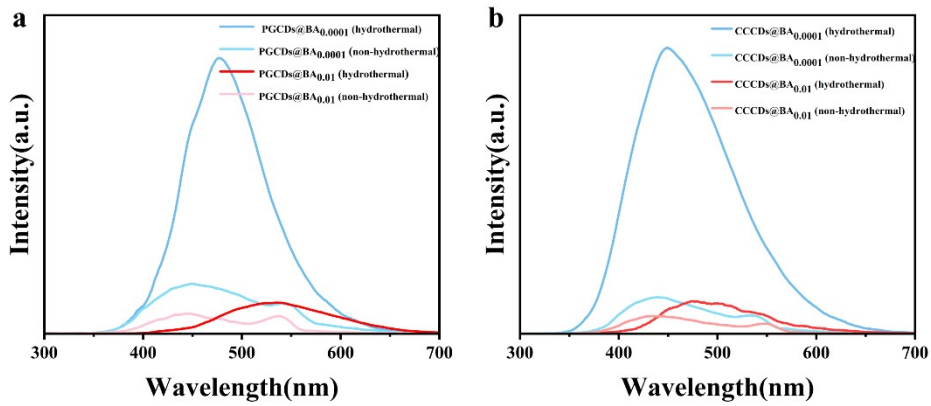

Fig. S10 (a) Comparison of spectra of PGCDs@BA<sub>0.01</sub> and PGCDs@BA<sub>0.0001</sub> before and after hydrothermal treatment; (b) Comparison of spectra of CCCDs@BA<sub>0.01</sub> and CCCDs@BA<sub>0.0001</sub> before and after hydrothermal treatment.

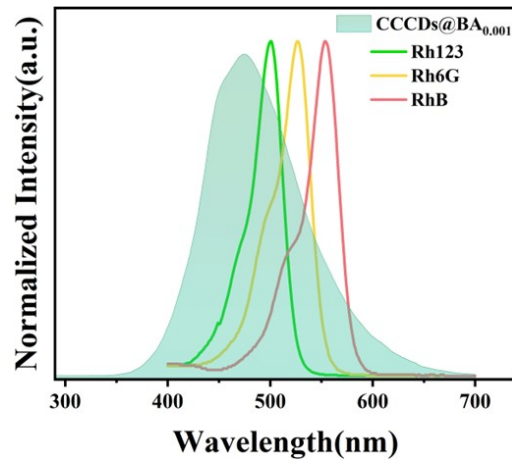

Fig.S11. Delayed PL spectrum ( $\lambda_{ex} = 270$  nm) of CCCDs@BA<sub>0.001</sub> and UV absorption spectra of fluorescent dyes (Rh123, Rh6G and RhB)

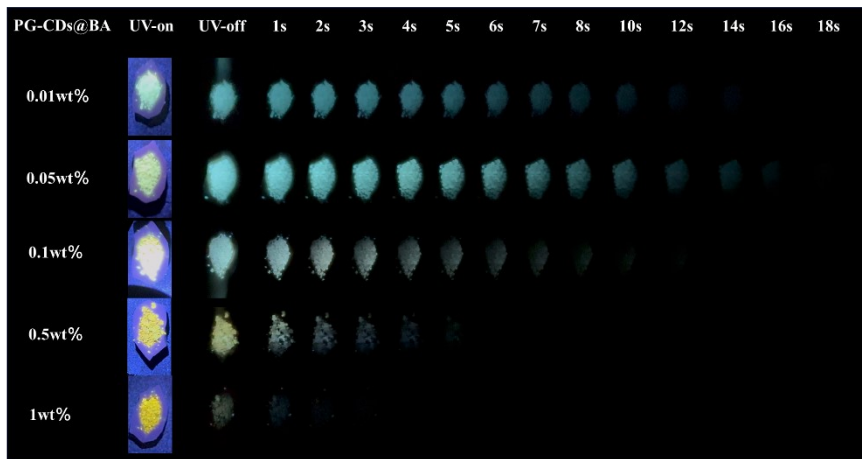

Fig.S12. Afterglow photos of PGCDs@BA powder with different doping concentration under 275 nm irradiation.

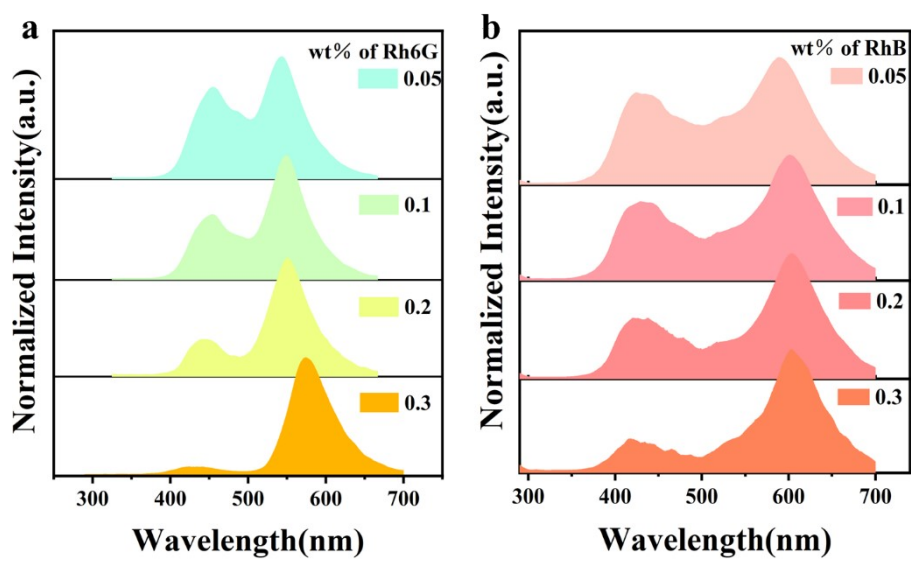

Fig.S13. Normalized delayed PL spectra of a) CCCDs@BA<sub>0.001</sub>@Rh6G and b) CCCDs@BA<sub>0.001</sub>@RhB.

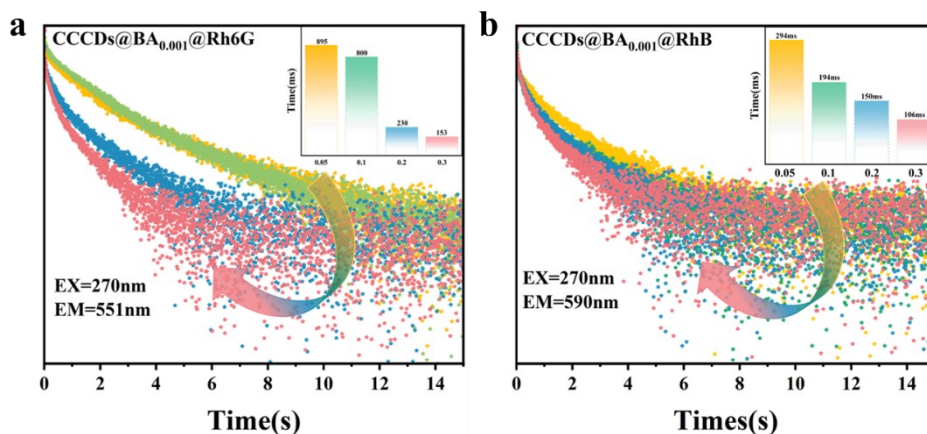

Fig.S14. Lifetime decay profiles of a) CCCDs@BA<sub>0.001</sub>@Rh6G and b) CCCDs@BA<sub>0.001</sub>@RhB powder with different doping concentration under 275 nm irradiation.

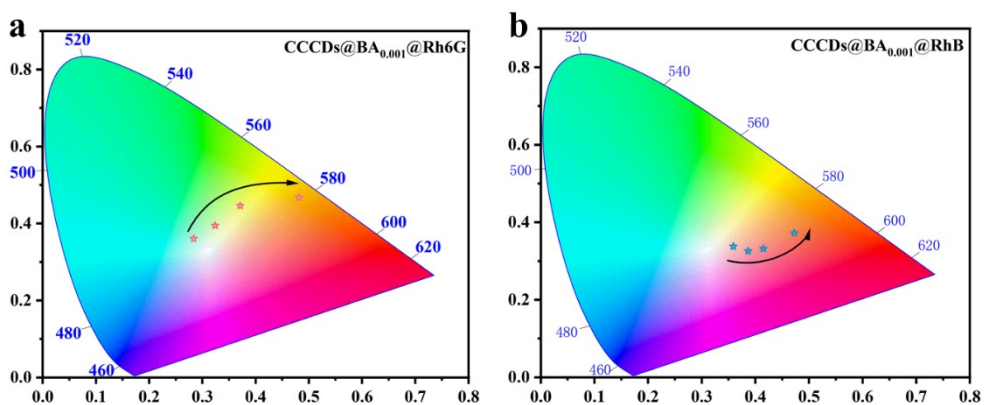

Fig.S15. CIE coordinates of afterglow emission of a) CCCDs@BA<sub>0.001</sub>@Rh6G and b) CCCDs@BA<sub>0.001</sub>@RhB powder.

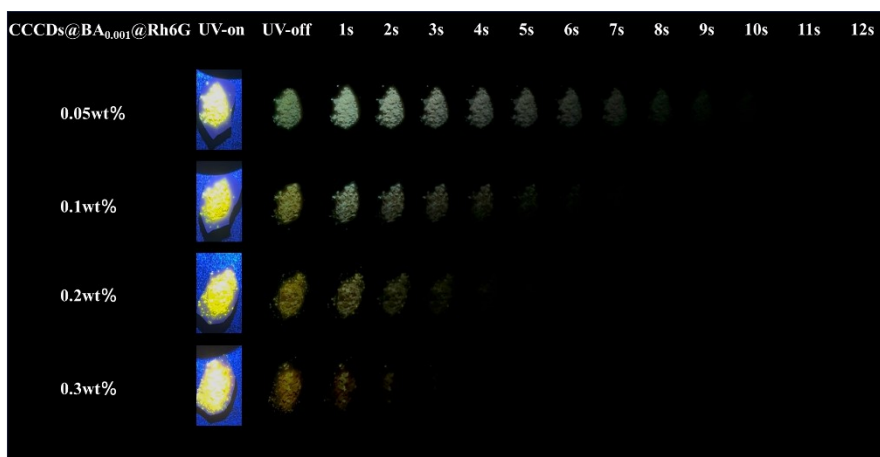

Fig.S16. Afterglow photos of CCCDs@BA<sub>0.001</sub>@Rh6G powder with different doping concentration under 275 nm irradiation.

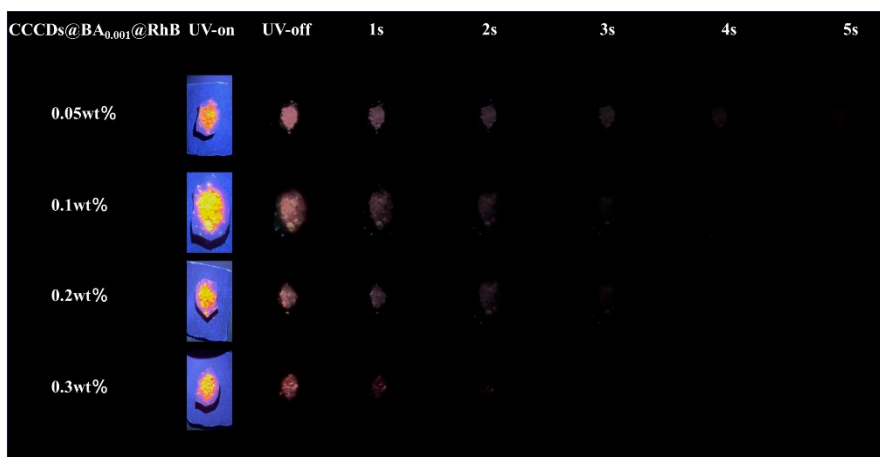

Fig.S17. Afterglow photos of CCCDs@BA<sub>0.001</sub>@RhB powder with different doping concentration under 275 nm irradiation.

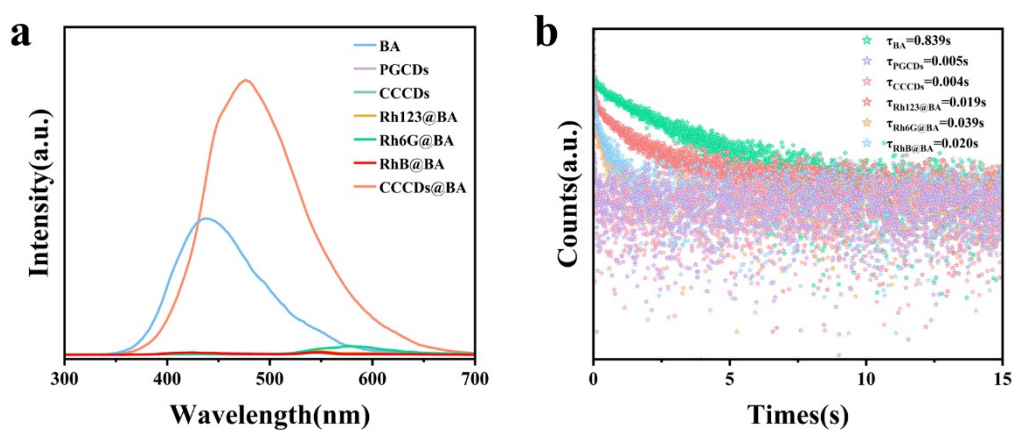

Fig.S18. Spectral comparison of pure BA, PGCDs, CCCDs, Rh123@BA, Rh6G@BA, RhB@BA, and CCCDs@BA<sub>0.001</sub> under identical hydrothermal conditions.

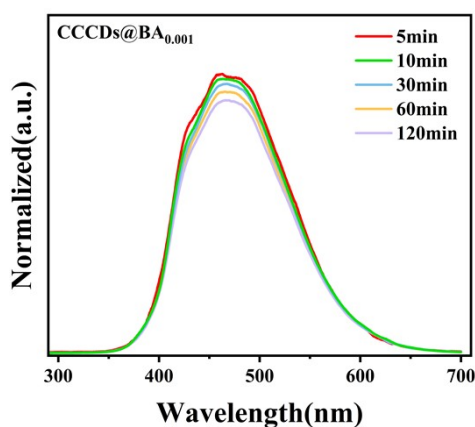

Fig.S19. Phosphorescence spectra of CCCDs@BA<sub>0.001</sub> under different irradiation times.

Table S1. Quantitative comparison between this work and recent related literature.

| Work                                              | Strategy              | Emission tunability | Lifetime (s) | PL quantum yield (%) | Efficiency (%) |
|---------------------------------------------------|-----------------------|---------------------|--------------|----------------------|----------------|
| This work                                         | CDs@BA                |                     |              |                      |                |
|                                                   | Aggregation + TS-FRET | 450-606             | 2.01         | 6.8                  | 77.7           |
| Li et al., CEJ 2023. <sup>1</sup>                 | Aggregation           | 530-750             | 1.66         | 32.8                 | N.R.           |
| Teng et al., ACS ANM 2022. <sup>2</sup>           | CDs@CNF               | 515-580             | 1.018        | 18                   | 50             |
|                                                   | TS-FRET               |                     |              |                      |                |
| Lu et al., Spectrochim. Acta A 2024. <sup>3</sup> | CDs@SiO <sub>2</sub>  | 503-570             | 1.10         | 1.36                 | N.R.           |
|                                                   | FRET                  |                     |              |                      |                |
| Jie et al., NJC 2023. <sup>4</sup>                | CDs@BA                | 435-526             | 0.914        | 34.2                 | N.R.           |

Note: N.R. = not reported.

Table S2. Quantitative color analysis of PGCDs@BA composites.

| Sample                     | CIE(x,y)    | $\Delta xy$ from previous | Color Purity (%) |
|----------------------------|-------------|---------------------------|------------------|
| PGCDs@BA <sub>0.0001</sub> | (0.17,0.25) | 0                         | 55.2             |
| PGCDs@BA <sub>0.005</sub>  | (0.19,0.31) | 0.067                     | 44.3             |
| PGCDs@BA <sub>0.001</sub>  | (0.22,0.37) | 0.137                     | 37.9             |
| PGCDs@BA <sub>0.05</sub>   | (0.27,0.45) | 0.233                     | 30.6             |
| PGCDs@BA <sub>0.01</sub>   | (0.32,0.47) | 0.286                     | 29.1             |

Table S3. Quantitative color analysis of CCCDs@BA composites.

| Sample                     | CIE(x,y)    | $\Delta xy$ from previous | Color Purity (%) |
|----------------------------|-------------|---------------------------|------------------|
| CCCDs@BA <sub>0.0001</sub> | (0.17,0.20) | 0                         | 62.3             |
| CCCDs@BA <sub>0.005</sub>  | (0.18,0.26) | 0.063                     | 48.7             |
| CCCDs@BA <sub>0.001</sub>  | (0.19,0.27) | 0.077                     | 46.2             |
| CCCDs@BA <sub>0.05</sub>   | (0.20,0.31) | 0.118                     | 39.5             |
| CCCDs@BA <sub>0.01</sub>   | (0.20,0.32) | 0.128                     | 37.8             |

Table S4. Quantitative color analysis of CCCDs@BA@Rh123 composites.

| Sample | CIE(x,y) | $\Delta xy$ from previous | Color Purity (%) |
|--------|----------|---------------------------|------------------|
|--------|----------|---------------------------|------------------|

|                                                  |             |       |      |
|--------------------------------------------------|-------------|-------|------|
| CCCDs@BA <sub>0.001</sub> @Rh123 <sub>0.05</sub> | (0.28,0.42) | 0     | 36.1 |
| CCCDs@BA <sub>0.001</sub> @Rh123 <sub>0.1</sub>  | (0.31,0.46) | 0.050 | 34.0 |
| CCCDs@BA <sub>0.001</sub> @Rh123 <sub>0.2</sub>  | (0.33,0.50) | 0.095 | 33.8 |
| CCCDs@BA <sub>0.001</sub> @Rh123 <sub>0.3</sub>  | (0.37,0.52) | 0.140 | 32.0 |

Table S5. Quantitative color analysis of CCCDs@BA@Rh6G composites.

| Sample                                          | CIE(x,y)    | $\Delta xy$ from previous | Color Purity (%) |
|-------------------------------------------------|-------------|---------------------------|------------------|
| CCCDs@BA <sub>0.001</sub> @Rh6G <sub>0.05</sub> | (0.28,0.36) | 0                         | 38.9             |
| CCCDs@BA <sub>0.001</sub> @Rh6G <sub>0.1</sub>  | (0.32,0.39) | 0.047                     | 36.5             |
| CCCDs@BA <sub>0.001</sub> @Rh6G <sub>0.2</sub>  | (0.37,0.44) | 0.114                     | 34.8             |
| CCCDs@BA <sub>0.001</sub> @Rh6G <sub>0.3</sub>  | (0.48,0.46) | 0.227                     | 34.2             |

Table S6. Quantitative color analysis of CCCDs@BA@RhB composites.

| Sample                                         | CIE(x,y)    | $\Delta xy$ from previous | Color Purity (%) |
|------------------------------------------------|-------------|---------------------------|------------------|
| CCCDs@BA <sub>0.001</sub> @RhB <sub>0.05</sub> | (0.35,0.33) | 0                         | 34.1             |
| CCCDs@BA <sub>0.001</sub> @RhB <sub>0.1</sub>  | (0.38,0.32) | 0.031                     | 32.5             |
| CCCDs@BA <sub>0.001</sub> @RhB <sub>0.2</sub>  | (0.41,0.33) | 0.062                     | 32.4             |
| CCCDs@BA <sub>0.001</sub> @RhB <sub>0.3</sub>  | (0.47,0.37) | 0.134                     | 33.0             |

Table S7 Summary of photophysical properties of PGCDs@BA powder at room temperature

| Sample                     | $\lambda_{em}$<br>(nm) | $\tau_p$<br>(s) | $\Phi_p$<br>(%) | $k_p$<br>(s <sup>-1</sup> ) | $k_{p, nr}$<br>(s <sup>-1</sup> ) |
|----------------------------|------------------------|-----------------|-----------------|-----------------------------|-----------------------------------|
| PGCDs@BA <sub>0.0001</sub> | 478                    | 1.92            | 5.92            | 0.0308                      | 0.490                             |
| PGCDs@BA <sub>0.0005</sub> | 488                    | 1.467           | 2.4             | 0.0164                      | 0.665                             |
| PGCDs@BA <sub>0.001</sub>  | 495                    | 1.211           | 6.21            | 0.0513                      | 0.775                             |
| PGCDs@BA <sub>0.005</sub>  | 531                    | 0.196           | 0.99            | 0.0505                      | 5.05                              |
| PGCDs@BA <sub>0.01</sub>   | 538                    | 0.143           | 1.88            | 0.1315                      | 6.86                              |

$\lambda_{em}$ : phosphorescence emission wavelength;  $\tau_p$ : phosphorescence lifetime;  $\Phi_p$ : phosphorescence quantum yield;  $k_p$ : radiative decay rate constant of phosphorescence;  $k_{p, nr}$ : non-radiative decay rate constant of phosphorescence.

Table S8 Summary of photophysical properties of CCCDs@BA powder at room temperature

| Sample                     | $\lambda_{em}$<br>(nm) | $\tau_p$<br>(s) | $\Phi_p$<br>(%) | $k_p$<br>(s <sup>-1</sup> ) | $k_{p, nr}$<br>(s <sup>-1</sup> ) |
|----------------------------|------------------------|-----------------|-----------------|-----------------------------|-----------------------------------|
| CCCDs@BA <sub>0.0001</sub> | 450                    | 1.334           | 5.3             | 0.0397                      | 0.710                             |
| CCCDs@BA <sub>0.0005</sub> | 473                    | 1.971           | 2.03            | 0.0103                      | 0.497                             |
| CCCDs@BA <sub>0.001</sub>  | 478                    | 2.01            | 4.41            | 0.0219                      | 0.476                             |
| CCCDs@BA <sub>0.005</sub>  | 490                    | 1.074           | 0.85            | 0.00792                     | 0.923                             |
| CCCDs@BA <sub>0.01</sub>   | 501                    | 0.843           | 0.93            | 0.0110                      | 1.175                             |

$\lambda_{em}$ : phosphorescence emission wavelength;  $\tau_p$ : phosphorescence lifetime;  $\Phi_p$ : phosphorescence quantum yield;  $k_p$ : radiative decay rate constant of phosphorescence;  $k_{p, nr}$ : non-radiative decay rate constant of phosphorescence.

Table S9. Energy transfer radius between the donor (CCCDs@BA<sub>0.001</sub>) and acceptors (Rh123, Rh6G and RhB).

| Sample                           | $J(\lambda)(T-S)$<br>(nm <sup>4</sup> M <sup>-1</sup> cm <sup>-1</sup> ) | $R(T-S)$<br>(Å) |
|----------------------------------|--------------------------------------------------------------------------|-----------------|
| CCCDs@BA <sub>0.001</sub> @Rh123 | $1.431 \times 10^{15}$                                                   | 30.0            |
| CCCDs@BA <sub>0.001</sub> @Rh6G  | $2.152 \times 10^{15}$                                                   | 32.4            |
| CCCDs@BA <sub>0.001</sub> @RhB   | $1.633 \times 10^{15}$                                                   | 30.7            |

$$R^6 = 8.8 \times 10^{-5} \left[ \kappa^2 n^{-4} \Phi_D J(\lambda) \right]$$

Where  $\kappa^2$  is the orientation factor of the molecular dipoles,  $n$  is the refractive index of the boric acid (BA) host,  $\Phi_D$  is the quantum yield of the donor, and  $J(\lambda)$  is the spectral overlap integral between the donor emission and the acceptor absorption (calculated from the normalized emission spectrum of the donor and the molar absorptivity spectra of the acceptors Rh123, Rh6G, and RhB using the A|E 1.2 FluorTools software)

In this work, the orientation factor is taken as  $\kappa^2=2/3$ , assuming that the fluorophores are well separated and randomly oriented during the excitation process. The refractive index of the BA matrix is  $n=1.5$ , and the donor quantum yield is  $\Phi_D=4.41\%$ . Using the above formula and the spectral overlap integrals  $J(\lambda)$  the calculated Förster energy transfer radii  $R_0$  range from 21 to 33 Å. This range lies within the typical FRET-effective distance of 10–100 Å, thus fully satisfying the basic requirements for efficient energy transfer from the phosphorescent donor to the fluorescent acceptors.

Table S10 Energy transfer parameters between CCCDs@BA0.001 (donor) and different Dyes (acceptor)

| Sample                           | wt% of Rh123 | $\lambda_{em}$<br>( nm ) | $\tau_p$<br>( s ) | $\Phi_p/f$<br>( % ) | E<br>( % ) | $k_{FRET}$<br>( s <sup>-1</sup> ) |
|----------------------------------|--------------|--------------------------|-------------------|---------------------|------------|-----------------------------------|
| CCCDs@BA <sub>0.001</sub>        | -            | 476                      | 2.01              | 4.41                | -          | -                                 |
|                                  | 0.05         | 476                      | 1.146             | 9.36                | 43.0       | 0.376                             |
| CCCDs@BA <sub>0.001</sub> @Rh123 | 0.1          | 530                      | 1.09              | 13.37               | 48.8       | 0.475                             |
|                                  |              | 476                      | 1.029             |                     |            |                                   |
|                                  | 0.2          | 530                      | 0.645             | 7.74                | 68.5       | 1.081                             |
|                                  |              | 476                      | 0.634             |                     |            |                                   |
| CCCDs@BA <sub>0.001</sub> @Rh6G  | 0.3          | 476                      | 0.449             | 9.66                | 77.7       | 1.729                             |
|                                  |              | 530                      | 0.202             |                     |            |                                   |
|                                  | 0.05         | 476                      | 1.389             | 4.89                | 30.9       | 0.222                             |
|                                  |              | 551                      | 0.895             |                     |            |                                   |
| CCCDs@BA <sub>0.001</sub> @RhB   | 0.1          | 476                      | 1.144             | 4.10                | 43.1       | 0.376                             |
|                                  |              | 551                      | 0.8               |                     |            |                                   |
|                                  | 0.2          | 476                      | 0.797             | 5.12                | 60.4       | 0.757                             |
|                                  |              | 551                      | 0.230             |                     |            |                                   |
| CCCDs@BA <sub>0.001</sub> @RhB   | 0.3          | 476                      | 0.595             | 2.92                | 70.4       | 1.182                             |
|                                  |              | 551                      | 0.153             |                     |            |                                   |
|                                  | 0.05         | 476                      | 1.218             | 3.08                | 39.4       | 0.323                             |
|                                  |              | 590                      | 0.294             |                     |            |                                   |
| CCCDs@BA <sub>0.001</sub> @RhB   | 0.1          | 476                      | 0.908             | 2.37                | 54.8       | 0.603                             |
|                                  |              | 590                      | 0.194             |                     |            |                                   |
|                                  | 0.2          | 476                      | 0.798             | 2.18                | 60.3       | 0.755                             |
|                                  |              | 590                      | 0.150             |                     |            |                                   |
| 0.3                              | 476          | 0.489                    | 1.56              | 75.7                | 1.547      |                                   |
|                                  | 590          | 0.106                    |                   |                     |            |                                   |

$$E = 1 - \tau_{DA}/\tau_D$$

$$k_{FRET} = 1/\tau_{DA} - 1/\tau_D$$

$\tau_{DA}$ : donor lifetime with acceptor;  $\tau_D$ : donor lifetime without acceptor; E: energy transfer efficiency from donor to acceptor;  $k_{FRET}$ : FRET rate from the donor (478 nm) to the acceptor (530 nm).

### Reference :

- 1 Q. Li, D. Cheng, H. Gu, D. Yang, Y. Li, S. Meng, Y. Zhao, Z. Tang, Y. Zhang, J. Tan and S. Qu, *Chemical Engineering Journal*, 2023, **462**, 142339.
- 2 X. Teng, X. Sun, W. Pan, Z. Song and J. Wang, *ACS Appl. Nano Mater.*, 2022, **5**, 5168–5175.
- 3 F. Lu, X. Xu, X. Zhu, L. Shen, W. Wan and M. Hu, *Spectrochimica Acta Part A: Molecular and Biomolecular Spectroscopy*, 2024, **304**, 123404.
- 4 Y. Jie, Y. Gao, D. Wang, F. Li, R. Chen, Y. Feng, W. Li and J. Fang, *New J. Chem.*, 2023, **47**, 16659–16665.
